# Supplementary material for: A peanut-like hierarchical micro/nano-Li1.2Mn0.54Ni0.18Co0.08O2cathode material for lithium-ion batteries with enhanced electrochemical performance
Source: Royal Society of Chemistry journal article supplement (doi:10.1039/c5ta02915e), 2015-01-01
Supplement: c5ta02915e1.pdf [file c5ta02915e1.pdf]

## Electronic supplementary information

### **Peanut-like hierarchical micro/nano $\text{Li}_{1.2}\text{Mn}_{0.54}\text{Ni}_{0.18}\text{Co}_{0.08}\text{O}_2$ cathode material for lithium-ion batteries with enhanced electrochemical performance**

Yi-di Zhang, Yi Li, Xiao-qing Niu, Dong-huang Wang, Ding Zhou, Xiu-li Wang,  
Chang-dong Gu, and Jiang-ping Tu\*

*State Key Laboratory of Silicon Materials, Key Laboratory of Advanced Materials and Applications for Batteries of Zhejiang Province, and School of Materials Science and Engineering, Zhejiang University, Hangzhou 310027, China*

\*Corresponding author. Tel.: +86 571 87952573; Fax: +86 571 87952856.

*E-mail address:* [tujp@zju.edu.cn](mailto:tujp@zju.edu.cn); [tujplab@zju.edu.cn](mailto:tujplab@zju.edu.cn) (J.P. Tu)

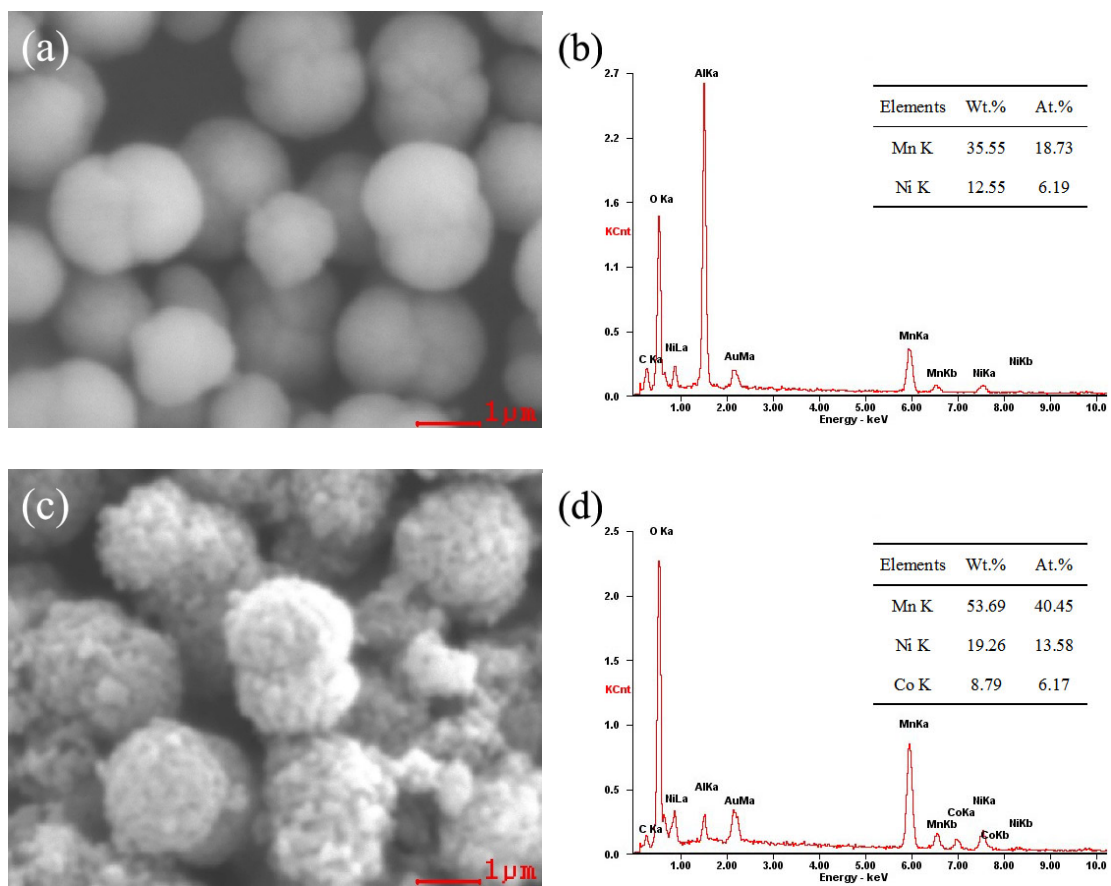

**Fig. S1** EDX results of (a, b)  $\text{Mn}_{0.75}\text{Ni}_{0.25}\text{CO}_3$  precursor, and (c, d) P-LMNCO.

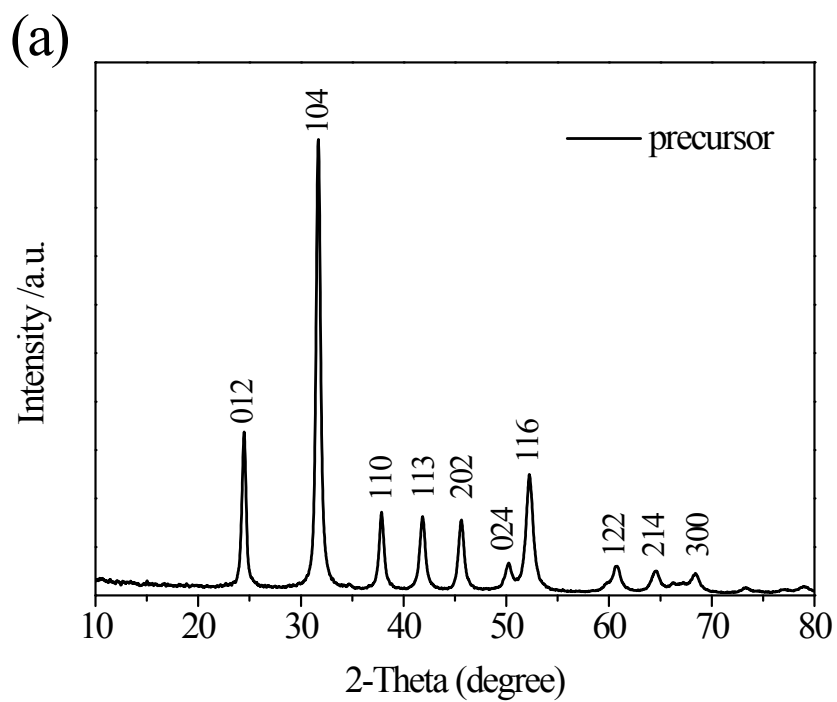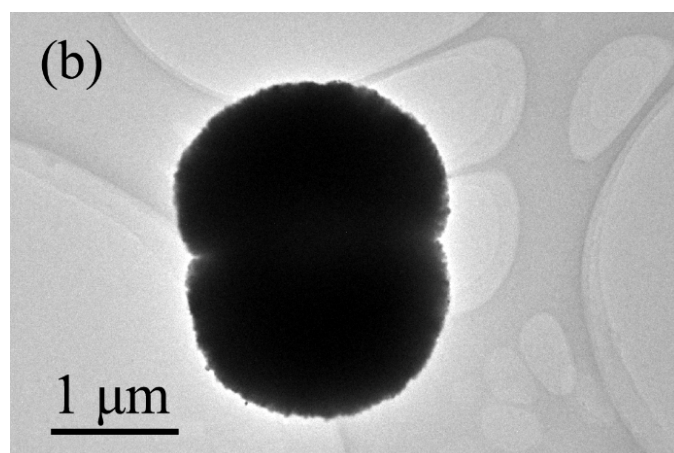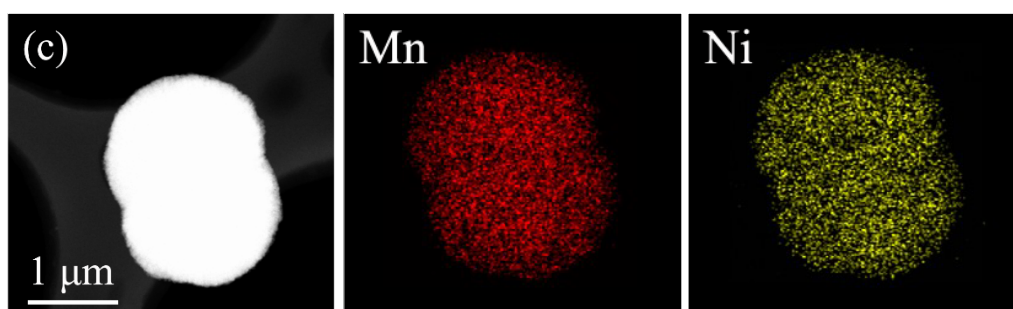

**Fig. S2** (a) XRD pattern, (b) TEM image and (c) EDX mapping of  $\text{Mn}_{0.75}\text{Ni}_{0.25}\text{CO}_3$  precursor.

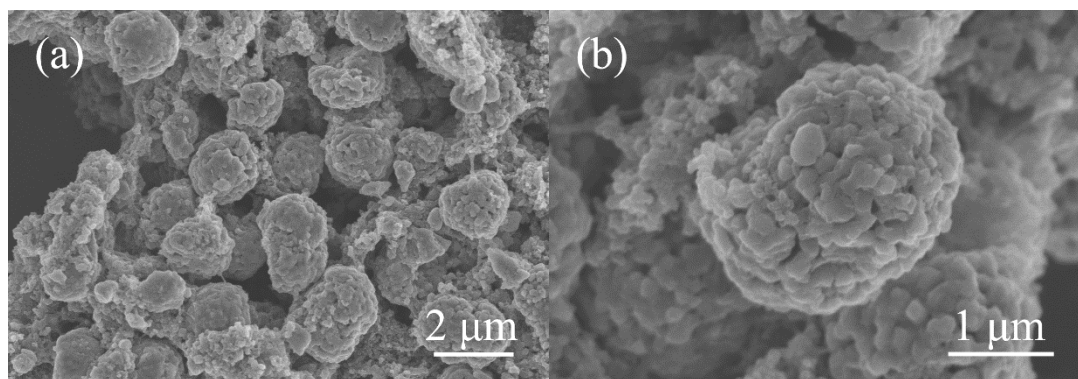

**Fig. S3** SEM images of P-LMNCO after 100 cycles at a current density of 200 mA g<sup>-1</sup>
